# Supplementary material for: Association of medically assisted reproduction with offspring cord blood DNA methylation across cohorts
Source: PubMed Central journal article supplement (PMC8289315; doi:10.1093/humrep/deab137), 2021-06-17
Supplement: deab137_supplementary_figure_s1.pdf [file deab137_supplementary_figure_s1.pdf]

human reproduction SUPPLEMENTARY DATA

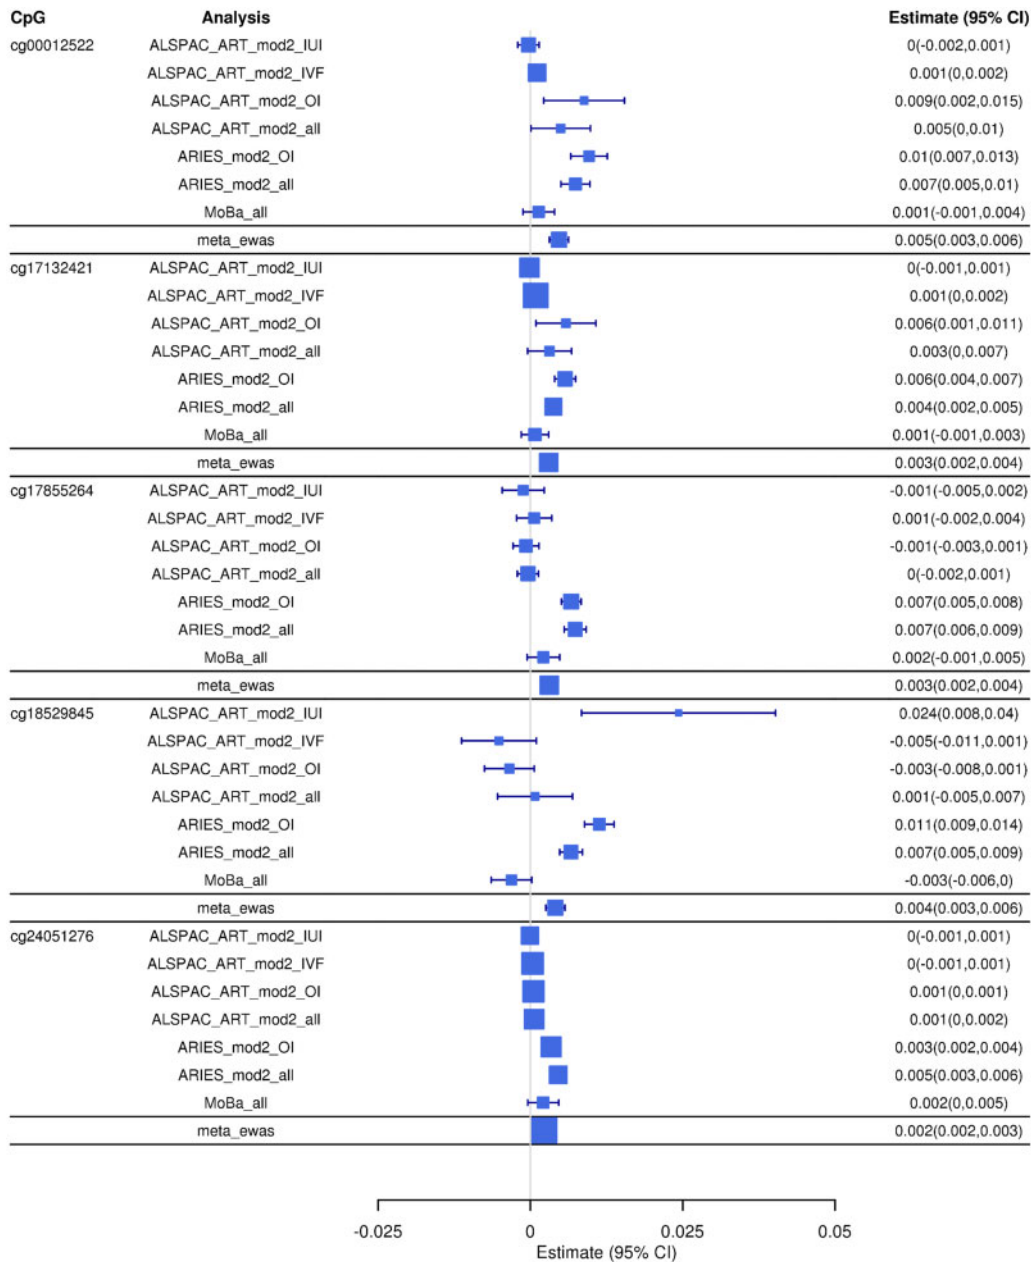

**Supplementary Figure S1. Association of cord blood DNA methylation and medically assisted reproduction (beta coefficients and 95% confidence intervals) across the subsamples used in the meta-analysis and by self-reported procedure.** ALSPAC-ART, ALSPAC-MAR subsample; ARIES, ALSPAC-ARIES subsample; IUI, intrauterine insemination; OI, ovulation induction; all, medically assisted reproduction.
