# Supplementary material for: Association of medically assisted reproduction with offspring cord blood DNA methylation across cohorts
Source: PubMed Central journal article supplement (PMC8289315; doi:10.1093/humrep/deab137), 2021-06-17
Supplement: deab137_supplementary_table_s1.pdf [file deab137_supplementary_table_s1.pdf]

**Supplementary Table S1** Distribution of other phenotypes in the ALSPAC-MAR sample.

|                            |           | Natural conception<br>N = 190 | Medically assisted reproduction<br>N = 155 |
|----------------------------|-----------|-------------------------------|--------------------------------------------|
| <b>Maternal phenotype</b>  |           |                               |                                            |
| Arthritis                  | No        | 167                           | 149                                        |
|                            | Yes       | 16                            | <5                                         |
| Diabetes history           | No        | 175                           | 154                                        |
|                            | Yes       | 15                            | <5                                         |
| Eating disorder            | No        | 179                           | 143                                        |
|                            | Yes       | 22                            | 6                                          |
| Preeclampsia               | No        | 146                           | 149                                        |
|                            | Yes       | 42                            | 5                                          |
| Hypertension history       | No        | 145                           | 142                                        |
|                            | Yes       | 41                            | 13                                         |
| Maternal BMI               | Mean (SD) | 25.88 (7.52)                  | 22.85 (4.67)                               |
| <b>Offspring phenotype</b> |           |                               |                                            |
| Autism                     | No        | 87                            | 98                                         |
|                            | Yes       | 24                            | <5                                         |
| Undescended testicle       | No        | 47                            | 34                                         |
|                            | Yes       | <5                            | 0                                          |
