# Supplementary material for: Association of medically assisted reproduction with offspring cord blood DNA methylation across cohorts
Source: PubMed Central journal article supplement (PMC8289315; doi:10.1093/humrep/deab137), 2021-06-17
Supplement: deab137_supplementary_table_s2.pdf [file deab137_supplementary_table_s2.pdf]

human reproduction **SUPPLEMENTARY DATA**

**Supplementary Table SII** Sample characteristics of samples included in the meta-epigenome-wide association study.

|                                      |             | ALSPAC-ARIES |              |          | ALSPAC-MAR   |              |          | MoBa         |              |           |
|--------------------------------------|-------------|--------------|--------------|----------|--------------|--------------|----------|--------------|--------------|-----------|
|                                      |             | Natural      | MAR          | P-value* | Natural      | MAR          | P-value* | Natural      | MAR          | P-value** |
| <b>Offspring gender at birth</b>     | Male        | 369          | 18           | 0.16     | 124          | 78           | 0.0071   | 806          | 6            | 0.013     |
|                                      | Female      | 387          | 10           |          | 66           | 77           |          | 690          | 16           |           |
| <b>Smoked during pregnancy</b>       | No          | 658          | <5           | 0.53     | 130          | 132          | 0.0005   | 1086         | 17           | 0.62      |
|                                      | Yes         | 98           | <5           |          | 60           | 23           |          | 410          | 5            |           |
| <b>BMI</b>                           | Mean (SD)   | 22.93 (3.85) | 22.58 (2.03) | 0.39     | 25.88 (7.52) | 22.85 (4.67) | 6.54E-06 | 24.13 (4.33) | 23.72 (3.55) | 0.66      |
| <b>Birthweight (g)</b>               | Mean (SD)   | 3496 (644)   | 3358 (599)   | 0.24     | 3406 (634)   | 3312 (552)   | 0.15     | 3649 (544)   | 3534 (293)   | 0.32      |
| <b>Gestation (weeks)</b>             | Mean (SD)   | 39.63 (1.46) | 39.14 (1.48) | 0.1      | 39.34 (1.94) | 39.32 (1.77) | 0.94     | 39.48 (1.62) | 39.54 (1.14) | 0.86      |
| <b>Maternal age delivery (years)</b> | Mean (SD)   | 29.59 (4.41) | 31.21 (4.08) | 0.05     | 27.90 (5.23) | 30.00 (4.01) | 3.10E-05 | 29.92 (4.26) | 32.27 (4.61) | 0.01      |
| <b>Sample type</b>                   | Blood spots | 136          | 9            | 0.1      | 29           | 73           | 2.51E-10 |              |              |           |
|                                      | White cells | 620          | 19           |          | 161          | 82           |          |              |              |           |

\*P-values for categorical variables calculated with <https://www.socscistatistics.com/tests/chisquare/Default2.aspx>.

\*\*P-values for continuous variables calculated with [https://www.medcalc.org/calc/comparison\\_of\\_means.php](https://www.medcalc.org/calc/comparison_of_means.php).

ALSPAC, Avon Longitudinal Study of Parents and Children; ARIES, Accessible Resource for Integrated Epigenomics Studies; MAR, Medically Assisted Reproduction; MoBa, Norwegian Mother, Father, and Child Birth Cohort.
