# Supplementary material for: Association of medically assisted reproduction with offspring cord blood DNA methylation across cohorts
Source: PubMed Central journal article supplement (PMC8289315; doi:10.1093/humrep/deab137), 2021-06-17
Supplement: deab137_supplementary_table_s3.pdf [file deab137_supplementary_table_s3.pdf]

**Supplementary Table SIII** Meta-epigenome-wide association study replication in the CHART cohort.

| CpG        | Gene   | No-ART mean | ART mean | No-ART SE | ART SE | Mean difference | P-value |
|------------|--------|-------------|----------|-----------|--------|-----------------|---------|
| cg00012522 | ARRDC4 | 7.1         | 6.9      | 0.2       | 0.1    | −0.2            | 0.16    |
| cg17132421 | ARRDC4 | 5.4         | 5.3      | 0.1       | 0.1    | 0.0             | 0.39    |
| cg17855264 |        | 5.0         | 4.7      | 0.2       | 0.1    | −0.3            | 0.09    |
| cg18529845 | SRD5A2 | 8.3         | 7.6      | 0.5       | 0.2    | −0.7            | 0.17    |
| cg24051276 |        | 4.5         | 4.5      | 0.1       | 0.1    | 0.0             | 0.83    |
