# Supplementary material for: Association of medically assisted reproduction with offspring cord blood DNA methylation across cohorts
Source: PubMed Central journal article supplement (PMC8289315; doi:10.1093/humrep/deab137), 2021-06-17
Supplement: deab137_supplementary_table_s4.pdf [file deab137_supplementary_table_s4.pdf]

Supplementary Table SIV CpG sites reported in the meta-epigenome-wide association study catalogue (nr = not reported).

| Author     | PMID     | Date      | Trait                            | Exposure                         | N   | CpG        | Location       | Chr | Pos       | Gene   | Beta  | SE     | P        |
|------------|----------|-----------|----------------------------------|----------------------------------|-----|------------|----------------|-----|-----------|--------|-------|--------|----------|
| Liu Y      | 23334450 | 1/20/2013 | Rheumatoid arthritis             | Rheumatoid arthritis             | 691 | cg24051276 | chr8:145561488 | 8   | 145561488 |        | 0.005 | 0.0004 | 9.72E-08 |
| Wozniak MB | 23526956 | 3/5/2013  | Clear cell renal carcinoma       | Clear cell renal carcinoma       | 129 | cg18529845 | chr2:31806042  | 2   | 31806042  | SRD5A2 | nr    | nr     | 3.88E-16 |
| Wozniak MB | 23526956 | 3/5/2013  | Clear cell renal carcinoma       | Clear cell renal carcinoma       | 129 | cg17855264 | chr15:37180636 | 15  | 37180636  |        | nr    | nr     | 1.16E-17 |
| Nones K    | 24500968 | 5/9/2014  | Pancreatic ductal adenocarcinoma | Pancreatic ductal adenocarcinoma | 196 | cg18529845 | chr2:31806042  | 2   | 31806042  | SRD5A2 | nr    | nr     | 2.91E-21 |
| Li Y       | 24603599 | 3/6/2014  | Frontotemporal dementia          | Frontotemporal dementia          | 148 | cg24051276 | chr8:145561488 | 8   | 145561488 |        | nr    | nr     | 0.374    |
| Li Y       | 24603599 | 3/6/2014  | Frontotemporal dementia          | Frontotemporal dementia          | 165 | cg24051276 | chr8:145561488 | 8   | 145561488 |        | nr    | nr     | 0.723    |
| Li Y       | 24603599 | 3/6/2014  | Progressive supranuclear palsy   | Progressive supranuclear palsy   | 228 | cg24051276 | chr8:145561488 | 8   | 145561488 |        | nr    | nr     | 0.0139   |
| Marttila S | 25888029 | 3/14/2015 | Ageing                           | Age group                        | 143 | cg18529845 | chr2:31806042  | 2   | 31806042  | SRD5A2 | 0.724 | 0.1031 | 2.26E-12 |
| Gross AM   | 27105112 | 4/21/2016 | HIV infection                    | HIV infection                    | 181 | cg18529845 | chr2:31806042  | 2   | 31806042  | SRD5A2 | 1.285 | 0.2794 | 4.20E-06 |
| Gross AM   | 27105112 | 4/21/2016 | HIV infection                    | HIV infection                    | 181 | cg17855264 | chr15:37180636 | 15  | 37180636  |        | 0.803 | 0.1796 | 7.91E-06 |
| Xu CJ      | 28056824 | 1/5/2017  | Age 4 vs age 0                   | Age 4 vs age 0                   | 269 | cg17855264 | chr15:37180636 | 15  | 37180636  |        | nr    | nr     | 2.48E-14 |
