# Supplementary material for: Association of medically assisted reproduction with offspring cord blood DNA methylation across cohorts
Source: PubMed Central journal article supplement (PMC8289315; doi:10.1093/humrep/deab137), 2021-06-17
Supplement: deab137_supplementary_table_s5.pdf [file deab137_supplementary_table_s5.pdf]

**Supplementary Table SV GO term enrichments for hyper- and hypo- methylated CpG sites identified in meta-epigenome-wide association study.****GO term enrichment using hyper-methylated CpGs amongst the first 100 CpG sites ranked by ascending P-value (n = 69)**

|            | Term | Ont                                                                                          | N   | DE | P.DE     | FDR      |
|------------|------|----------------------------------------------------------------------------------------------|-----|----|----------|----------|
| GO:0044794 | BP   | Positive regulation by host of viral process                                                 | 16  | 3  | 1.95E–05 | 0.445101 |
| GO:0044788 | BP   | Modulation by host of viral process                                                          | 29  | 3  | 8.29E–05 | 0.948715 |
| GO:2000809 | BP   | Positive regulation of synaptic vesicle clustering                                           | 5   | 2  | 0.000166 |          |
| GO:0006702 | BP   | Androgen biosynthetic process                                                                | 11  | 2  | 0.000284 |          |
| GO:0051817 | BP   | Modification of morphology or physiology of other organism involved in symbiotic interaction | 112 | 4  | 0.000379 |          |
| GO:2000807 | BP   | Regulation of synaptic vesicle clustering                                                    | 9   | 2  | 0.000635 |          |
| GO:0035821 | BP   | modification of morphology or physiology of other organism                                   | 160 | 4  | 0.000885 |          |
| GO:0097104 | BP   | Postsynaptic membrane assembly                                                               | 12  | 2  | 0.001053 |          |
| GO:0051851 | BP   | Modification by host of symbiont morphology or physiology                                    | 77  | 3  | 0.001386 |          |
| GO:0051592 | BP   | Response to calcium ion                                                                      | 146 | 4  | 0.001556 |          |
| GO:0051702 | BP   | Interaction with symbiont                                                                    | 82  | 3  | 0.001667 |          |
| GO:0097091 | BP   | Synaptic vesicle clustering                                                                  | 16  | 2  | 0.00195  |          |
| GO:1901585 | BP   | Regulation of acid-sensing ion channel activity                                              | 1   | 1  | 0.002382 |          |
| GO:0008209 | BP   | Androgen metabolic process                                                                   | 28  | 2  | 0.002537 |          |
| GO:0072341 | MF   | Modified amino acid binding                                                                  | 86  | 3  | 0.002808 |          |
| GO:0071277 | BP   | Cellular response to calcium ion                                                             | 82  | 3  | 0.002948 |          |
| GO:0009917 | MF   | Sterol 5-alpha reductase activity                                                            | 1   | 1  | 0.002972 |          |
| GO:0035597 | MF   | N6-isopentenyladenosine methylthiotransferase activity                                       | 1   | 1  | 0.003066 |          |
| GO:0048792 | BP   | Spontaneous exocytosis of neurotransmitter                                                   | 1   | 1  | 0.003272 |          |
| GO:0002174 | BP   | Mammary stem cell proliferation                                                              | 1   | 1  | 0.003307 |          |

**GO term enrichment using hypo-methylated CpGs amongst the first 100 CpG sites ranked by ascending P value (n = 31)**

|            | Term | Ont                                                     | N   | DE | P.DE   | FDR |
|------------|------|---------------------------------------------------------|-----|----|--------|-----|
| GO:0042396 | BP   | Phosphagen biosynthetic process                         | 5   |    | 0.002  |     |
| GO:0006599 | BP   | Phosphagen metabolic process                            | 5   |    | 0.002  |     |
| GO:0046314 | BP   | Phosphocreatine biosynthetic process                    | 5   |    | 0.002  |     |
| GO:0006603 | BP   | Phosphocreatine metabolic process                       | 5   |    | 0.002  |     |
| GO:0006649 | BP   | Phospholipid transfer to membrane                       | 2   |    | 0.0027 |     |
| GO:0052026 | BP   | Modulation by symbiont of host transcription            | 1   |    | 0.003  |     |
| GO:0019056 | BP   | Modulation by virus of host transcription               | 1   |    | 0.003  |     |
| GO:0039656 | BP   | Modulation by virus of host gene expression             | 3   |    | 0.0033 |     |
| GO:0003952 | MF   | NAD+ synthase (glutamine-hydrolyzing) activity          | 1   |    | 0.0035 |     |
| GO:0008622 | CC   | Epsilon DNA polymerase complex                          | 5   |    | 0.0039 |     |
| GO:0090555 | MF   | Phosphatidylethanolamine-translocating ATPase activity  | 2   |    | 0.0041 |     |
| GO:0097733 | CC   | Photoreceptor cell cilium                               | 112 | 2  | 0.0043 |     |
| GO:0097731 | CC   | 9 + 0 non-motile cilium                                 | 114 | 2  | 0.0044 |     |
| GO:0004359 | MF   | Glutaminase activity                                    | 3   |    | 0.0044 |     |
| GO:0045004 | BP   | DNA replication proofreading                            | 2   |    | 0.0047 |     |
| GO:0008310 | MF   | Single-stranded DNA 3'–5' exodeoxyribonuclease activity | 6   |    | 0.0048 |     |
| GO:0006600 | BP   | Creatine metabolic process                              | 8   |    | 0.0049 |     |
| GO:0006272 | BP   | Leading strand elongation                               | 3   |    | 0.0049 |     |

(continued)

## Supplementary Table SV Continued

## GO term enrichment using hypo-methylated CpGs amongst the first 100 CpG sites ranked by ascending P value (n = 31)

|            | Term | Ont                                           | N | DE | P.DE   | FDR |
|------------|------|-----------------------------------------------|---|----|--------|-----|
| GO:1904121 | MF   | Phosphatidylethanolamine transporter activity | 3 | 1  | 0.0052 | 1   |
| GO:0004111 | MF   | Creatine kinase activity                      | 6 | 1  | 0.0054 | 1   |

## GO term enrichment using the first 100 CpG sites ranked by ascending P value

|            | Term | Ont                                                                                          | N   | DE | P.DE      | FDR |
|------------|------|----------------------------------------------------------------------------------------------|-----|----|-----------|-----|
| GO:0044794 | BP   | Positive regulation by host of viral process                                                 | 16  | 3  | 4.69E-05  | 1   |
| GO:0051817 | BP   | Modification of morphology or physiology of other organism involved in symbiotic interaction | 112 | 5  | 9.11E-05  | 1   |
| GO:0044788 | BP   | Modulation by host of viral process                                                          | 29  | 3  | 0.00019   | 1   |
| GO:0035821 | BP   | Modification of morphology or physiology of other organism                                   | 160 | 5  | 0.0002361 | 1   |
| GO:2000809 | BP   | Positive regulation of synaptic vesicle clustering                                           | 5   | 2  | 0.0003716 | 1   |
| GO:0006702 | BP   | Androgen biosynthetic process                                                                | 11  | 2  | 0.0005193 | 1   |
| GO:0099068 | BP   | Postsynapse assembly                                                                         | 30  | 3  | 0.0008634 | 1   |
| GO:2000807 | BP   | Regulation of synaptic vesicle clustering                                                    | 9   | 2  | 0.0014622 | 1   |
| GO:0097104 | BP   | Postsynaptic membrane assembly                                                               | 12  | 2  | 0.0024321 | 1   |
| GO:1901585 | BP   | Regulation of acid-sensing ion channel activity                                              | 1   | 1  | 0.002454  | 1   |
| GO:0051851 | BP   | Modification by host of symbiont morphology or physiology                                    | 77  | 3  | 0.0029057 | 1   |
| GO:0006271 | BP   | DNA strand elongation involved in DNA replication                                            | 20  | 2  | 0.0030088 | 1   |
| GO:0097381 | CC   | Photoreceptor disc membrane                                                                  | 23  | 2  | 0.0031191 | 1   |
| GO:0051702 | BP   | Interaction with symbiont                                                                    | 82  | 3  | 0.0034682 | 1   |
| GO:0035597 | MF   | N6-isopentenyladenosine methyltransferase activity                                           | 1   | 1  | 0.0036888 | 1   |
| GO:0009917 | MF   | Sterol 5-alpha reductase activity                                                            | 1   | 1  | 0.0037508 | 1   |
| GO:0048792 | BP   | Spontaneous exocytosis of neurotransmitter                                                   | 1   | 1  | 0.0038042 | 1   |
| GO:0006297 | BP   | Nucleotide-excision repair, DNA gap filling                                                  | 23  | 2  | 0.0041488 | 1   |
| GO:0097091 | BP   | Synaptic vesicle clustering                                                                  | 16  | 2  | 0.0043277 | 1   |
| GO:0002174 | BP   | Mammary stem cell proliferation                                                              | 1   | 1  | 0.0045403 | 1   |
