# Supplementary material for: Association of medically assisted reproduction with offspring cord blood DNA methylation across cohorts
Source: PubMed Central journal article supplement (PMC8289315; doi:10.1093/humrep/deab137), 2021-06-17
Supplement: deab137_supplementary_table_s8.pdf [file deab137_supplementary_table_s8.pdf]

**Supplementary Table SVIII** Associations found in the GWAS catalog pertaining genes mapped to the top CpG sites of the meta-analysis.

| Pubmed ID | First Author        | Date      | Disease Trait         | Chromosome | Position | Mapped Gene | SNP       | P-value  |
|-----------|---------------------|-----------|-----------------------|------------|----------|-------------|-----------|----------|
| 28196072  | Hagenaars SP        | 2/14/2017 | Male-pattern baldness | 2          | 31580756 | SRD5A2      | rs9282858 | 2.00E-23 |
| 27182965  | Pickrell JK         | 5/16/2016 | Male-pattern baldness | 2          | 31580756 | SRD5A2      | rs9282858 | 2.00E-15 |
| 28272467  | Heilmann-Heimbach S | 3/8/2017  | Male-pattern baldness | 2          | 31580756 | SRD5A2      | rs9282858 | 9.00E-18 |
