# Supplementary material for: Association of medically assisted reproduction with offspring cord blood DNA methylation across cohorts
Source: PubMed Central journal article supplement (PMC8289315; doi:10.1093/humrep/deab137), 2021-06-17
Supplement: deab137_supplementary_table_s9.pdf [file deab137_supplementary_table_s9.pdf]

**Supplementary Table SIX** Look-up of top 18 CpG sites from [Novakovic et al. \(2019\)](#) as reported in Supplementary Data S1, in the current meta-analysis.

| CpG        | Direction CHART | Effect* meta-analysis | SD meta-analysis | P-value meta-analysis | Direction by study in the meta-analysis | UCSC gene name |
|------------|-----------------|-----------------------|------------------|-----------------------|-----------------------------------------|----------------|
| cg10553748 | –               | –0.0165               | 0.006            | 0.006                 | +–                                      | CHRNE          |
| cg03904042 | –               | –0.033                | 0.0123           | 0.007                 | —                                       | NECAB3         |
| cg24768135 | –               | –0.0231               | 0.0113           | 0.041                 | +–                                      | CHRNE          |
| cg16761754 | –               | –0.0198               | 0.0111           | 0.073                 | —                                       |                |
| cg12610079 | +               | –0.0057               | 0.0035           | 0.103                 | —                                       | C1orf110       |
| cg02406531 | –               | 0.0048                | 0.0063           | 0.439                 | –++                                     |                |
| cg04471375 | +               | –0.0031               | 0.0043           | 0.467                 | +–                                      | GOT2           |
| cg26536949 | +               | –0.0083               | 0.0255           | 0.746                 | +–                                      |                |
| cg10318313 | +               | –0.0004               | 0.0042           | 0.921                 | +–+                                     | NAPIL4         |

\*Difference in proportion methylation.
